# Supplementary material for: The relationship between plasma amino acids and circulating albumin and haemoglobin in postabsorptive stroke patients
Source: PubMed Central journal article supplement (PMC6693779; doi:10.1371/journal.pone.0219756), 2019-08-14
Supplement: pone.0219756.s001.pdf [file pone.0219756.s001.pdf]

| id_code | Grp | ASP_TO | Glu_TO | HIS_TO | ASN_TO | SER_TO | GLN_TO | 3MeH_TO | ARG_TO | Citr_TO |
|---------|-----|--------|--------|--------|--------|--------|--------|---------|--------|---------|
| 1       | 0   | 15     | 50     | 78     | 49     | 108    | 717    | 6,5     | 71     | 53      |
| 2       | 0   | 11     | 61     | 53     | 49     | 88     | 515    | 2       | 59     | 25      |
| 3       | 0   | 13     | 73     | 77     | 55     | 82     | 678    | 3       | 51     | 27      |
| 4       | 0   | 11     | 68     | 62     | 48     | 114    | 533    | 3       | 78     | 33      |
| 5       | 0   | 13     | 69     | 84     | 62     | 114    | 612    | 6,5     | 65     | 33      |
| 6       | 0   | 13     | 112    | 80     | 69     | 176    | 695    | 4,7     | 79     | 24      |
| 7       | 0   | 9      | 70     | 64     | 39     | 117    | 504    | 3,2     | 26     | 27      |
| 8       | 0   | 7      | 33     | 74     | 54     | 103    | 500    | 3,2     | 94     | 35      |
| 9       | 0   | 10     | 33     | 62     | 38     | 61     | 543    | 4       | 57     | 37      |
| 10      | 0   | 11     | 69     | 78     | 45     | 102    | 647    | 4,8     | 48     | 28      |
| 11      | 0   | 9      | 122    | 59     | 47     | 155    | 501    | 2       | 44     | 23      |
| 12      | 0   | 13     | 53     | 56     | 56     | 146    | 566    | 5,9     | 96     | 28      |
| 13      | 0   | 11     | 47     | 47     | 52     | 104    | 620    | 2,4     | 55     | 24      |
| 14      | 0   | 13     | 34     | 40     | 41     | 123    | 545    | 3,1     | 56     | 22      |
| 15      | 0   | 11     | 70     | 64     | 48     | 105    | 537    | 6,2     | 65     | 49      |
| 16      | 0   | 9      | 87     | 85     | 51     | 119    | 691    | 3,7     | 74     | 42      |
| 17      | 0   | 15     | 68     | 69     | 35     | 110    | 444    | 3,4     | 43     | 36      |
| 18      | 0   | 15     | 38     | 77     | 46     | 99     | 544    | 4,3     | 43     | 32      |
| 19      | 0   | 21     | 34     | 55     | 41     | 94     | 504    | 4,1     | 39     | 44      |
| 20      | 0   | 13     | 66     | 84     | 63     | 173    | 662    | 3       | 72     | 52      |
| 21      | 0   | 12     | 78     | 93     | 65     | 160    | 656    | 5,8     | 83     | 38      |
| 22      | 0   | 13     | 66     | 86     | 52     | 103    | 501    | 3,6     | 66     | 34      |
| 23      | 0   | 10     | 62     | 41     | 38     | 68     | 513    | 2       | 33     | 27      |
| 24      | 0   | 10     | 69     | 75     | 42     | 110    | 636    | 3,8     | 40     | 23      |
| 25      | 0   | 11     | 96     | 91     | 52     | 136    | 628    | 3,7     | 52     | 32      |
| 26      | 0   | 11     | 66     | 80     | 53     | 103    | 575    | 10      | 74     | 52      |
| 27      | 0   | 13     | 80     | 125    | 125    | 243    | 1082   | 4,1     | 131    | 35      |
| 28      | 0   | 9      | 41     | 56     | 51     | 73     | 456    | 3,1     | 36     | 22      |
| 29      | 0   | 13     | 66     | 73     | 42     | 92     | 530    | 5,7     | 44     | 54      |
| 30      | 0   | 15     | 52     | 97     | 67     | 156    | 805    | 3,5     | 78     | 56      |
| 31      | 0   | 10     | 87     | 74     | 43     | 140    | 583    | 3,9     | 72     | 32      |
| 32      | 0   | 8      | 77     | 77     | 51     | 113    | 611    | 4,2     | 58     | 38      |
| 33      | 0   | 11     | 68     | 62     | 43     | 64     | 501    | 4,7     | 34     | 34      |
| 34      | 0   | 12     | 84     | 90     | 62     | 101    | 774    | 3,9     | 36     | 41      |
| 35      | 0   | 10     | 90     | 73     | 44     | 113    | 552    | 4,1     | 71     | 30      |
| 36      | 0   | 12     | 172    | 56     | 36     | 124    | 419    | 3,3     | 53     | 22      |
| 37      | 0   | 11     | 64     | 84     | 53     | 85     | 500    | 5,1     | 63     | 34      |
| 38      | 0   | 12     | 63     | 77     | 50     | 104    | 635    | 4,3     | 46     | 29      |
| 39      | 0   | 13     | 63     | 90     | 56     | 175    | 725    | 3,5     | 92     | 40      |
| 40      | 0   | 9      | 67     | 80     | 46     | 83     | 514    | 3,8     | 57     | 24      |
| 41      | 0   | 11     | 50     | 76     | 63     | 107    | 796    | 7,1     | 96     | 44      |
| 42      | 0   | 13     | 87     | 101    | 57     | 122    | 651    | 3,9     | 59     | 33      |
| 43      | 0   | 7      | 90     | 50     | 44     | 101    | 351    | 3,4     | 58     | 14      |
| 44      | 0   | 9      | 71     | 57     | 33     | 90     | 448    | 3,7     | 50     | 20      |
| 45      | 0   | 7      | 36     | 38     | 32     | 58     | 289    | 3,7     | 30     | 22      |
| 46      | 0   | 13     | 137    | 84     | 44     | 81     | 498    | 4,8     | 56     | 36      |
| 47      | 0   | 11     | 111    | 45     | 40     | 134    | 461    | 3,7     | 33     | 8       |
| 48      | 0   | 13     | 73     | 74     | 49     | 98     | 645    | 5       | 71     | 47      |
| 49      | 0   | 12     | 95     | 104    | 55     | 122    | 626    | 4,4     | 53     | 35      |

|    |   |    |     |     |    |     |     |     |     |    |
|----|---|----|-----|-----|----|-----|-----|-----|-----|----|
| 50 | 0 | 15 | 79  | 81  | 49 | 187 | 673 | 6,6 | 66  | 40 |
| 51 | 0 | 10 | 66  | 76  | 35 | 81  | 575 | 5,8 | 26  | 33 |
| 52 | 0 | 10 | 92  | 91  | 52 | 93  | 524 | 2,6 | 94  | 45 |
| 53 | 0 | 12 | 71  | 72  | 36 | 87  | 476 | 3,9 | 45  | 26 |
| 54 | 0 | 13 | 101 | 51  | 41 | 138 | 620 | 3,5 | 47  | 23 |
| 55 | 0 | 15 | 88  | 79  | 52 | 126 | 583 | 4,3 | 36  | 50 |
| 56 | 0 | 11 | 73  | 59  | 41 | 125 | 606 | 3,9 | 65  | 38 |
| 57 | 0 | 9  | 60  | 74  | 43 | 111 | 536 | 4,1 | 50  | 32 |
| 58 | 0 | 9  | 70  | 73  | 39 | 95  | 515 | 5,4 | 49  | 38 |
| 59 | 0 | 13 | 81  | 86  | 46 | 129 | 556 | 4,1 | 58  | 33 |
| 60 | 0 | 12 | 51  | 92  | 63 | 133 | 543 | 4,8 | 110 | 45 |
| 61 | 0 | 13 | 113 | 73  | 64 | 161 | 887 | 4,2 | 97  | 30 |
| 62 | 0 | 11 | 48  | 69  | 51 | 98  | 637 | 4,2 | 84  | 35 |
| 63 | 0 | 13 | 71  | 107 | 62 | 118 | 658 | 4,6 | 66  | 38 |
| 64 | 0 | 10 | 91  | 93  | 58 | 166 | 899 | 3,4 | 58  | 57 |
| 65 | 0 | 12 | 59  | 91  | 62 | 105 | 677 | 3,8 | 77  | 27 |
| 66 | 0 | 11 | 80  | 106 | 70 | 138 | 554 | 4   | 98  | 36 |
| 67 | 0 | 10 | 59  | 68  | 50 | 115 | 670 | 4   | 59  | 31 |
| 68 | 0 | 9  | 55  | 87  | 62 | 114 | 746 | 2   | 94  | 41 |
| 69 | 0 | 13 | 78  | 61  | 40 | 77  | 671 | 5   | 64  | 33 |
| 70 | 0 | 10 | 65  | 68  | 51 | 118 | 754 | 3,6 | 73  | 41 |
| 71 | 0 | 12 | 55  | 76  | 52 | 120 | 554 | 5,3 | 78  | 34 |
| 72 | 0 | 10 | 86  | 97  | 53 | 111 | 865 | 4   | 45  | 46 |
| 73 | 0 | 11 | 91  | 67  | 50 | 118 | 519 | 3,7 | 79  | 18 |
| 74 | 0 | 11 | 83  | 81  | 44 | 148 | 535 | 2,7 | 53  | 37 |
| 75 | 0 | 13 | 55  | 75  | 44 | 131 | 596 | 3,4 | 45  | 31 |
| 76 | 0 | 11 | 55  | 45  | 52 | 80  | 542 | 4,7 | 49  | 22 |
| 77 | 0 | 13 | 41  | 70  | 50 | 89  | 563 | 3,4 | 61  | 28 |
| 78 | 0 | 15 | 61  | 78  | 67 | 95  | 713 | 5,9 | 44  | 39 |
| 79 | 0 | 11 | 72  | 87  | 68 | 147 | 670 | 4,5 | 57  | 31 |
| 80 | 0 | 12 | 72  | 75  | 47 | 113 | 540 | 3,6 | 74  | 23 |
| 81 | 0 | 11 | 77  | 81  | 51 | 116 | 578 | 4,3 | 41  | 32 |
| 82 | 0 | 11 | 128 | 60  | 37 | 72  | 473 | 4,6 | 43  | 36 |
| 83 | 0 | 10 | 49  | 55  | 47 | 157 | 555 | 4,3 | 46  | 25 |
| 84 | 0 | 7  | 68  | 54  | 39 | 76  | 451 | 4   | 33  | 32 |
| 85 | 0 | 13 | 76  | 75  | 49 | 102 | 487 | 3,6 | 65  | 32 |
| 86 | 0 | 14 | 71  | 84  | 53 | 139 | 593 | 3,6 | 78  | 28 |
| 87 | 0 | 12 | 61  | 65  | 53 | 118 | 555 | 3,2 | 4   | 27 |
| 88 | 0 | 10 | 51  | 67  | 80 | 99  | 664 | 3,6 | 90  | 37 |
| 89 | 0 | 8  | 56  | 57  | 34 | 106 | 402 | 3,6 | 45  | 15 |
| 90 | 0 | 13 | 63  | 77  | 54 | 122 | 658 | 3,9 | 58  | 36 |
| 91 | 0 | 11 | 60  | 77  | 55 | 146 | 667 | 4,3 | 49  | 46 |
| 92 | 0 | 12 | 75  | 53  | 44 | 111 | 570 | 3,6 | 59  | 19 |
| 93 | 0 | 12 | 81  | 78  | 64 | 180 | 665 | 3,6 | 46  | 30 |
| 94 | 0 | 12 | 104 | 76  | 56 | 112 | 510 | 3,3 | 54  | 31 |
| 95 | 0 | 9  | 56  | 47  | 48 | 79  | 358 | 3,9 | 63  | 22 |
| 96 | 0 | 11 | 73  | 69  | 36 | 83  | 457 | 2,9 | 68  | 17 |
| 97 | 0 | 11 | 112 | 62  | 52 | 120 | 800 | 3,4 | 59  | 32 |
| 98 | 0 | 9  | 44  | 66  | 43 | 119 | 530 | 4,1 | 83  | 40 |
| 99 | 0 | 13 | 46  | 85  | 65 | 101 | 636 | 4,6 | 58  | 47 |

|     |   |     |     |    |    |     |     |     |    |    |
|-----|---|-----|-----|----|----|-----|-----|-----|----|----|
| 100 | 0 | 11  | 82  | 64 | 48 | 128 | 523 | 4,2 | 50 | 43 |
| 101 | 0 | 14  | 102 | 74 | 43 | 99  | 481 | 5,3 | 43 | 46 |
| 102 | 0 | 12  | 68  | 43 | 38 | 78  | 374 | 6,5 | 70 | 33 |
| 103 | 0 | 16  | 54  | 73 | 54 | 135 | 483 | 4,1 | 63 | 44 |
| 104 | 0 | 14  | 59  | 78 | 52 | 141 | 582 | 4   | 50 | 42 |
| 105 | 0 | 8   | 58  | 60 | 38 | 97  | 395 | 4,8 | 45 | 21 |
| 106 | 0 | 10  | 130 | 77 | 45 | 103 | 561 | 4   | 49 | 42 |
| 107 | 0 | 7   | 65  | 53 | 50 | 140 | 543 | 3,8 | 45 | 17 |
| 108 | 0 | 14  | 53  | 69 | 46 | 95  | 627 | 5,1 | 50 | 34 |
| 109 | 0 | 15  | 60  | 80 | 47 | 85  | 466 | 3,7 | 80 | 38 |
| 110 | 0 | 10  | 41  | 63 | 41 | 91  | 674 | 3,8 | 53 | 24 |
| 111 | 0 | 8   | 56  | 52 | 43 | 102 | 450 | 3,3 | 54 | 26 |
| 112 | 0 | 8   | 64  | 78 | 42 | 104 | 597 | 4   | 58 | 32 |
| 113 | 0 | 13  | 74  | 88 | 51 | 121 | 516 | 4,2 | 47 | 46 |
| 114 | 0 | 11  | 148 | 57 | 47 | 116 | 531 | 3,1 | 65 | 18 |
| 115 | 0 | 7   | 80  | 48 | 36 | 76  | 500 | 4,5 | 34 | 17 |
| 116 | 0 | 8   | 69  | 38 | 27 | 72  | 389 | 3,6 | 38 | 20 |
| 117 | 0 | 8   | 71  | 73 | 44 | 115 | 495 | 3,5 | 40 | 39 |
| 118 | 0 | 9   | 108 | 72 | 40 | 93  | 482 | 3   | 70 | 22 |
| 119 | 0 | 12  | 77  | 67 | 41 | 143 | 512 | 4,1 | 61 | 34 |
| 120 | 0 | 9   | 66  | 85 | 45 | 127 | 578 | 3,7 | 83 | 34 |
| 121 | 0 | 13  | 62  | 75 | 45 | 63  | 563 | 4,6 | 54 | 36 |
| 122 | 0 | 13  | 69  | 67 | 52 | 95  | 502 | 4,8 | 81 | 34 |
| 123 | 0 | 13  | 82  | 68 | 34 | 112 | 576 | 4,8 | 41 | 19 |
| 124 | 0 | 14  | 46  | 76 | 49 | 118 | 582 | 5,6 | 59 | 34 |
| 125 | 0 | 13  | 37  | 71 | 15 | 156 | 489 | 4,3 | 43 | 14 |
| C1  | 1 | 120 | 195 | 59 | 62 | 91  | 451 |     | 50 | 20 |
| C2  | 1 | 125 | 210 | 61 | 59 | 95  | 471 |     | 66 | 26 |
| C3  | 1 | 111 | 199 | 57 | 59 | 82  | 475 |     | 59 | 20 |
| C4  | 1 | 120 | 215 | 63 | 64 | 89  | 450 |     | 71 | 30 |
| C5  | 1 | 103 | 189 | 64 | 59 | 90  | 456 |     | 50 | 24 |
| C6  | 1 | 101 | 185 | 51 | 62 | 87  | 490 |     | 64 | 29 |
| C7  | 1 | 60  | 191 | 59 | 63 | 84  | 470 |     | 60 | 25 |
| C8  | 1 | 105 | 205 | 50 | 62 | 90  | 456 |     | 54 | 23 |
| C9  | 1 | 12  | 171 | 37 | 58 | 37  | 89  |     | 60 |    |
| C10 | 1 | 7   | 90  | 38 | 36 | 33  | 77  |     | 46 |    |
| C11 | 1 | 10  | 145 | 35 | 58 | 49  | 113 |     | 54 |    |
| C12 | 1 | 4   | 57  | 60 | 29 | 46  | 433 |     | 63 |    |
| C13 | 1 | 7   | 108 | 68 | 36 | 46  | 80  |     | 83 |    |
| C14 | 1 | 7   | 50  | 63 | 44 | 44  | 417 |     | 71 |    |
| C15 | 1 | 12  | 159 | 40 | 67 | 71  | 65  |     | 57 |    |

| GLY_TO | THR_TO | ALA_TO | TAU_TO | TYR_TO | g_ambutir_TO | VAL_TO | MET_TO | TRP_TO | PHE_TO | LEU_TO |
|--------|--------|--------|--------|--------|--------------|--------|--------|--------|--------|--------|
| 395    | 161    | 384    | 80     | 54     | 5            | 225    | 24     | 41     | 53     | 104    |
| 231    | 126    | 318    | 77     | 69     | 9            | 226    | 25     | 39     | 76     | 124    |
| 369    | 190    | 438    | 76     | 76     | 12           | 277    | 37     | 42     | 63     | 143    |
| 202    | 158    | 385    | 74     | 67     | 15           | 239    | 22     | 43     | 64     | 134    |
| 304    | 179    | 483    | 97     | 78     | 8            | 239    | 31     | 62     | 62     | 152    |
| 259    | 180    | 337    | 73     | 49     | 5            | 161    | 26     | 50     | 39     | 95     |
| 257    | 125    | 419    | 54     | 48     | 14           | 234    | 16     | 33     | 48     | 121    |
| 219    | 115    | 245    | 74     | 54     | 34           | 308    | 37     | 37     | 65     | 170    |
| 241    | 71     | 190    | 78     | 37     | 10           | 172    | 21     | 31     | 55     | 109    |
| 251    | 127    | 395    | 71     | 55     | 28           | 314    | 24     | 46     | 53     | 171    |
| 216    | 99     | 342    | 38     | 63     | 29           | 230    | 28     | 52     | 43     | 139    |
| 252    | 194    | 241    | 91     | 64     | 9            | 201    | 39     | 39     | 60     | 132    |
| 432    | 112    | 363    | 74     | 56     | 16           | 127    | 27     | 29     | 47     | 75     |
| 279    | 102    | 226    | 39     | 46     | 30           | 147    | 20     | 26     | 46     | 80     |
| 225    | 129    | 294    | 84     | 67     | 41           | 355    | 38     | 46     | 77     | 209    |
| 241    | 118    | 315    | 156    | 61     | 25           | 323    | 27     | 46     | 54     | 157    |
| 289    | 112    | 312    | 89     | 42     | 17           | 203    | 23     | 30     | 46     | 117    |
| 205    | 118    | 311    | 46     | 52     | 21           | 236    | 26     | 34     | 58     | 125    |
| 251    | 126    | 309    | 81     | 51     | 13           | 161    | 19     | 35     | 55     | 94     |
| 285    | 158    | 280    | 63     | 81     | 34           | 267    | 30     | 48     | 70     | 169    |
| 280    | 155    | 447    | 117    | 130    | 48           | 320    | 42     | 53     | 77     | 179    |
| 203    | 116    | 358    | 75     | 52     | 12           | 267    | 42     | 45     | 142    | 135    |
| 279    | 60     | 182    | 142    | 57     | 3            | 149    | 14     | 24     | 60     | 63     |
| 256    | 138    | 474    | 60     | 57     | 29           | 263    | 30     | 44     | 51     | 132    |
| 304    | 191    | 462    | 103    | 80     | 25           | 272    | 35     | 49     | 63     | 147    |
| 237    | 100    | 359    | 156    | 63     | 27           | 248    | 31     | 45     | 78     | 149    |
| 329    | 248    | 674    | 101    | 138    | 46           | 563    | 33     | 115    | 140    | 342    |
| 189    | 94     | 314    | 86     | 78     | 12           | 208    | 21     | 38     | 68     | 105    |
| 273    | 128    | 273    | 73     | 52     | 28           | 288    | 30     | 39     | 56     | 153    |
| 269    | 286    | 369    | 66     | 112    | 44           | 492    | 66     | 47     | 66     | 147    |
| 212    | 155    | 255    | 133    | 45     | 13           | 240    | 40     | 47     | 50     | 131    |
| 184    | 135    | 348    | 97     | 86     | 49           | 424    | 47     | 56     | 70     | 207    |
| 205    | 133    | 247    | 82     | 42     | 21           | 222    | 25     | 31     | 79     | 124    |
| 227    | 160    | 395    | 65     | 69     | 27           | 269    | 36     | 43     | 55     | 142    |
| 254    | 96     | 215    | 60     | 63     | 6            | 382    | 42     | 28     | 55     | 92     |
| 320    | 101    | 213    | 194    | 57     | 5            | 166    | 26     | 28     | 59     | 98     |
| 280    | 127    | 436    | 139    | 71     | 12           | 212    | 24     | 48     | 68     | 122    |
| 266    | 148    | 314    | 84     | 66     | 10           | 268    | 28     | 34     | 52     | 142    |
| 343    | 177    | 348    | 104    | 52     | 9            | 220    | 25     | 37     | 46     | 101    |
| 198    | 137    | 432    | 85     | 76     | 13           | 294    | 29     | 47     | 64     | 157    |
| 454    | 238    | 371    | 80     | 56     | 23           | 125    | 27     | 29     | 64     | 65     |
| 192    | 126    | 439    | 79     | 80     | 28           | 274    | 31     | 53     | 64     | 152    |
| 254    | 137    | 220    | 84     | 84     | 27           | 190    | 28     | 44     | 57     | 112    |
| 299    | 99     | 265    | 104    | 50     | 24           | 205    | 25     | 35     | 49     | 100    |
| 146    | 56     | 183    | 93     | 51     | 11           | 207    | 18     | 39     | 64     | 120    |
| 244    | 110    | 324    | 133    | 91     | 13           | 307    | 46     | 51     | 63     | 155    |
| 254    | 75     | 298    | 89     | 44     | 11           | 194    | 26     | 26     | 40     | 93     |
| 342    | 179    | 374    | 142    | 52     | 10           | 139    | 20     | 36     | 73     | 100    |
| 276    | 188    | 596    | 110    | 60     | 12           | 178    | 24     | 48     | 62     | 151    |

|     |     |     |     |     |    |     |    |    |    |     |
|-----|-----|-----|-----|-----|----|-----|----|----|----|-----|
| 386 | 179 | 362 | 156 | 39  | 17 | 174 | 16 | 40 | 61 | 137 |
| 277 | 77  | 331 | 104 | 48  | 7  | 115 | 13 | 46 | 63 | 114 |
| 265 | 222 | 534 | 68  | 90  | 17 | 277 | 50 | 60 | 71 | 153 |
| 202 | 88  | 279 | 100 | 85  | 11 | 258 | 20 | 49 | 57 | 150 |
| 534 | 148 | 372 | 97  | 61  | 32 | 198 | 25 | 46 | 51 | 98  |
| 286 | 164 | 276 | 83  | 58  | 11 | 213 | 26 | 46 | 51 | 126 |
| 276 | 138 | 294 | 82  | 47  | 27 | 223 | 23 | 38 | 47 | 119 |
| 193 | 103 | 327 | 72  | 80  | 29 | 344 | 32 | 47 | 90 | 190 |
| 286 | 138 | 310 | 86  | 64  | 12 | 245 | 26 | 35 | 78 | 114 |
| 209 | 129 | 402 | 96  | 73  | 22 | 272 | 32 | 41 | 52 | 147 |
| 435 | 175 | 348 | 86  | 87  | 12 | 228 | 34 | 52 | 67 | 121 |
| 337 | 172 | 371 | 94  | 82  | 15 | 240 | 29 | 52 | 60 | 147 |
| 277 | 138 | 357 | 78  | 62  | 12 | 206 | 33 | 33 | 55 | 115 |
| 248 | 226 | 523 | 148 | 71  | 23 | 421 | 42 | 51 | 65 | 197 |
| 390 | 152 | 435 | 109 | 70  | 21 | 328 | 30 | 51 | 61 | 188 |
| 263 | 157 | 366 | 145 | 70  | 16 | 305 | 48 | 53 | 64 | 176 |
| 325 | 172 | 451 | 86  | 103 | 21 | 329 | 45 | 59 | 59 | 177 |
| 295 | 110 | 210 | 100 | 50  | 11 | 155 | 18 | 44 | 49 | 92  |
| 251 | 155 | 379 | 79  | 82  | 6  | 260 | 28 | 54 | 69 | 154 |
| 243 | 107 | 329 | 76  | 54  | 15 | 210 | 30 | 31 | 45 | 94  |
| 537 | 160 | 335 | 58  | 77  | 11 | 265 | 25 | 19 | 44 | 123 |
| 320 | 129 | 372 | 128 | 56  | 18 | 365 | 39 | 39 | 71 | 193 |
| 309 | 195 | 326 | 125 | 63  | 14 | 283 | 28 | 34 | 49 | 137 |
| 202 | 164 | 419 | 77  | 68  | 21 | 294 | 25 | 50 | 70 | 191 |
| 257 | 147 | 280 | 96  | 60  | 11 | 226 | 27 | 40 | 43 | 118 |
| 246 | 182 | 343 | 75  | 54  | 23 | 235 | 30 | 36 | 51 | 120 |
| 217 | 131 | 418 | 71  | 86  | 12 | 262 | 32 | 23 | 57 | 132 |
| 274 | 184 | 380 | 69  | 79  | 8  | 258 | 37 | 55 | 58 | 125 |
| 285 | 90  | 441 | 110 | 77  | 9  | 220 | 28 | 44 | 91 | 137 |
| 250 | 219 | 373 | 110 | 69  | 22 | 354 | 31 | 59 | 70 | 199 |
| 177 | 135 | 262 | 90  | 67  | 14 | 299 | 25 | 48 | 61 | 165 |
| 186 | 136 | 387 | 97  | 64  | 16 | 361 | 28 | 44 | 63 | 223 |
| 204 | 70  | 427 | 85  | 63  | 45 | 263 | 20 | 43 | 61 | 139 |
| 328 | 106 | 207 | 102 | 46  | 13 | 184 | 18 | 30 | 50 | 93  |
| 150 | 76  | 209 | 77  | 74  | 13 | 204 | 22 | 34 | 63 | 120 |
| 256 | 170 | 484 | 126 | 91  | 39 | 243 | 28 | 48 | 66 | 129 |
| 293 | 156 | 339 | 103 | 71  | 29 | 267 | 32 | 64 | 58 | 159 |
| 247 | 167 | 366 | 110 | 70  | 17 | 201 | 26 | 46 | 36 | 112 |
| 284 | 178 | 447 | 155 | 66  | 24 | 170 | 27 | 38 | 60 | 97  |
| 197 | 82  | 269 | 98  | 37  | 22 | 189 | 17 | 38 | 50 | 120 |
| 338 | 196 | 360 | 67  | 74  | 28 | 252 | 28 | 28 | 57 | 128 |
| 286 | 174 | 277 | 138 | 51  | 22 | 213 | 25 | 38 | 55 | 104 |
| 316 | 139 | 465 | 156 | 46  | 15 | 182 | 24 | 41 | 45 | 103 |
| 324 | 224 | 258 | 131 | 46  | 39 | 236 | 22 | 36 | 47 | 132 |
| 275 | 155 | 293 | 118 | 92  | 32 | 262 | 30 | 51 | 82 | 166 |
| 211 | 106 | 215 | 65  | 78  | 30 | 215 | 34 | 37 | 86 | 125 |
| 192 | 82  | 325 | 81  | 52  | 14 | 192 | 23 | 48 | 48 | 110 |
| 235 | 128 | 317 | 102 | 67  | 34 | 221 | 26 | 36 | 44 | 134 |
| 253 | 89  | 290 | 119 | 47  | 25 | 199 | 19 | 51 | 52 | 106 |
| 299 | 139 | 491 | 148 | 73  | 20 | 248 | 32 | 43 | 62 | 157 |

|     |     |     |     |     |    |     |     |    |     |     |
|-----|-----|-----|-----|-----|----|-----|-----|----|-----|-----|
| 242 | 114 | 325 | 87  | 78  | 34 | 248 | 24  | 41 | 63  | 140 |
| 206 | 114 | 237 | 99  | 53  | 31 | 248 | 19  | 39 | 57  | 141 |
| 137 | 89  | 223 | 144 | 66  | 20 | 277 | 28  | 26 | 76  | 146 |
| 391 | 163 | 385 | 68  | 85  | 18 | 232 | 33  | 36 | 59  | 124 |
| 369 | 182 | 352 | 69  | 64  | 22 | 209 | 29  | 49 | 54  | 115 |
| 236 | 85  | 238 | 68  | 55  | 20 | 261 | 23  | 36 | 76  | 153 |
| 231 | 110 | 340 | 79  | 69  | 21 | 217 | 26  | 43 | 54  | 123 |
| 340 | 153 | 153 | 99  | 49  | 56 | 216 | 22  | 28 | 64  | 137 |
| 294 | 150 | 336 | 57  | 45  | 44 | 317 | 26  | 28 |     | 290 |
| 364 | 143 | 438 | 183 | 59  | 16 | 280 | 29  | 58 | 73  | 159 |
| 312 | 98  | 264 | 60  | 44  | 7  | 155 | 27  | 33 | 43  | 83  |
| 244 | 115 | 261 | 114 | 65  | 14 | 204 | 30  | 42 | 88  | 108 |
| 205 | 114 | 279 | 53  | 53  | 25 | 275 | 25  | 25 | 59  | 160 |
| 274 | 189 | 376 | 99  | 62  | 47 | 335 | 31  | 53 | 58  | 162 |
| 221 | 113 | 404 | 117 | 103 | 22 | 242 | 35  | 51 | 76  | 135 |
| 182 | 77  | 270 | 109 | 71  | 23 | 237 | 22  | 40 | 60  | 128 |
| 259 | 71  | 225 | 139 | 62  | 15 | 173 | 20  | 34 | 69  | 74  |
| 241 | 115 | 261 | 70  | 52  | 24 | 289 | 28  | 44 | 59  | 159 |
| 256 | 115 | 444 | 90  | 74  | 20 | 253 | 28  | 51 | 58  | 149 |
| 274 | 157 | 300 | 94  | 65  | 37 | 214 | 21  | 50 | 57  | 112 |
| 273 | 124 | 386 | 78  | 47  | 7  | 210 | 26  | 39 | 55  | 117 |
| 260 | 133 | 436 | 110 | 92  | 17 | 264 | 32  | 61 | 73  | 139 |
| 224 | 132 | 415 | 74  | 67  | 26 | 271 | 30  | 46 | 65  | 146 |
| 287 | 69  | 543 | 62  | 41  | 41 | 257 | 25  | 17 | 39  | 139 |
| 210 | 122 | 283 | 69  | 51  | 17 | 189 | 25  | 54 | 48  | 113 |
| 239 | 146 | 553 | 61  | 39  | 35 | 303 | 50  | 44 | 133 | 125 |
| 270 | 120 | 301 | 120 | 50  |    | 135 | 8,5 | 40 | 45  | 75  |
| 261 | 110 | 310 | 131 | 55  |    | 140 | 10  | 55 | 46  | 80  |
| 273 | 105 | 315 | 121 | 51  |    | 138 | 13  | 54 | 44  | 81  |
| 285 | 121 | 300 | 140 | 65  |    | 149 | 10  | 56 | 49  | 70  |
| 264 | 98  | 319 | 109 | 54  |    | 171 | 10  | 58 | 41  | 82  |
| 254 | 106 | 325 | 135 | 51  |    | 162 | 8,9 | 52 | 52  | 88  |
| 284 | 100 | 291 | 185 | 65  |    | 170 | 12  | 48 | 50  | 75  |
| 255 | 99  | 340 | 125 | 59  |    | 149 | 8,1 | 50 | 41  | 71  |
| 180 | 90  | 303 |     | 46  |    | 187 | 29  | 41 | 44  | 110 |
| 64  | 92  | 180 |     | 26  |    | 108 | 10  | 24 | 25  | 51  |
| 170 | 106 | 326 |     | 50  |    | 171 | 29  | 40 | 42  | 97  |
| 138 | 57  | 176 |     | 38  |    | 157 | 18  | 35 | 32  | 79  |
| 125 | 78  | 247 |     | 35  |    | 135 | 17  | 24 | 33  | 66  |
| 76  | 155 | 297 |     | 54  |    | 158 | 17  | 32 | 37  | 70  |
| 227 | 129 | 236 |     | 42  |    | 160 | 27  | 41 | 43  | 84  |

| ORN_TO | LYS_TO | ILE_TO | album_TO | HB_TO | sex | age | height | weight_TO |
|--------|--------|--------|----------|-------|-----|-----|--------|-----------|
| 94     | 147    | 55     | 4        | 13,8  | M   | 37  | 160    | 66        |
| 75     | 204    | 64     | 3,4      | 14,9  | M   | 63  | 170    | 75        |
| 82     | 228    | 86     | 3,2      | 12,3  | F   | 42  | 160    | 57        |
| 77     | 231    | 70     | 3,4      | 16,3  | M   | 46  | 170    | 80        |
| 52     | 256    | 73     | 4,5      | 14,4  | M   | 63  | 174    | 90        |
| 51     | 216    | 46     | 4,2      | 14,1  | M   | 39  | 182    | 80        |
| 100    | 195    | 65     | 3,6      | 13,9  | M   | 54  | 160    | 70        |
| 73     | 265    | 86     | 3        | 13,3  | M   | 81  | 160    | 48        |
|        | 129    | 57     | 3,5      | 12,3  | M   | 80  | 155    | 55        |
| 100    | 239    | 87     | 4        | 14,9  | M   | 63  | 178    | 75        |
|        | 222    | 75     | 3,7      | 14,8  | M   | 49  | 172    | 90        |
| 53     | 236    | 81     | 3,2      | 12,4  | M   | 80  | 160    | 55        |
| 74     | 199    | 56     | 2,2      | 10,3  | F   | 77  | 160    | 80        |
| 70     | 176    | 61     | 2,8      | 10,8  | F   | 71  | 162    | 82        |
| 106    | 291    | 107    | 2,6      | 12,2  | M   | 78  | 180    | 83        |
| 54     | 199    | 70     | 3,5      | 15,2  | F   | 63  | 155    | 56        |
| 87     | 146    | 56     | 3,1      | 14    | F   | 88  | 160    | 74        |
| 86     | 221    | 62     | 3,2      | 12,4  | M   | 62  | 170    | 74        |
| 88     | 225    | 40     | 2,7      | 13,2  | F   | 89  | 150    | 45        |
| 110    | 247    | 81     | 3,6      | 16,3  | M   | 64  | 170    | 65        |
| 119    | 261    | 94     | 4,2      | 12,5  | M   | 75  | 165    | 74        |
| 119    | 193    | 73     | 4        | 14,7  | M   | 73  | 165    | 97        |
| 59     | 128    | 25     | 2,4      | 10,3  | M   | 66  | 166    | 58        |
| 75     | 213    | 82     | 3,7      | 14,2  | M   | 78  | 175    | 91        |
| 102    | 218    | 76     | 4        | 15,2  | M   | 64  | 182    | 88        |
| 105    | 269    | 59     | 3,6      | 12,7  | F   | 84  | 150    | 48        |
| 77     | 453    | 143    | 4        | 14    | M   | 62  | 170    | 65        |
| 75     | 141    | 58     | 2,6      | 12,3  | F   | 74  | 170    | 76        |
| 95     | 183    | 92     | 3,3      | 12,5  | M   | 69  | 165    | 82        |
| 33     | 84     | 76     | 3,3      | 10,9  | F   | 68  | 160    | 79        |
| 83     | 237    | 70     | 4,3      | 14,9  | M   | 57  | 162    | 62        |
| 160    | 244    | 105    | 4        | 17    | M   | 60  | 171    | 87        |
| 120    | 199    | 62     | 3,5      | 13,7  | F   | 75  | 155    | 45        |
| 162    | 217    | 76     | 3,2      | 15,7  | M   | 67  | 182    | 76        |
| 113    | 116    | 42     | 2,3      | 10,4  | F   | 75  | 154    | 53        |
| 65     | 175    | 56     | 2,1      | 11,3  | M   | 65  | 160    | 49        |
| 114    | 279    | 57     | 3,3      | 13,2  | F   | 78  | 150    | 70        |
| 122    | 215    | 74     | 3,2      | 13,6  | M   | 74  | 175    | 80        |
| 105    | 74     | 50     | 4        | 13,5  | M   | 60  | 174    | 65        |
| 96     | 291    | 83     | 3,4      | 13,6  | F   | 74  | 160    | 82        |
| 50     | 203    | 40     | 2,5      | 8,9   | F   | 74  | 160    | 56        |
| 86     | 268    | 76     | 3,4      | 15,3  | M   | 63  | 164    | 84        |
| 70     | 263    | 64     | 2,9      | 10,4  | M   | 40  | 185    | 85        |
| 52     | 113    | 60     | 3,3      | 10    | F   | 50  | 160    | 79        |
| 39     | 161    | 48     | 3        | 9,9   | F   | 83  | 160    | 60        |
| 110    | 237    | 65     | 3,9      | 15,6  | M   | 64  | 175    | 84        |
| 62     | 99     | 58     | 2,4      | 12,2  | F   | 59  | 170    | 103       |
| 123    | 233    | 50     | 2,6      | 11,3  | F   | 95  | 160    | 63        |
| 116    | 252    | 78     | 3,2      | 12,9  | F   | 48  | 155    | 74        |

|     |     |     |     |         |    |     |     |
|-----|-----|-----|-----|---------|----|-----|-----|
| 132 | 234 | 65  | 3,5 | 13,6 F  | 44 | 171 | 115 |
| 216 | 192 | 38  | 2,5 | 11,3 M  | 63 | 172 | 63  |
| 131 | 295 | 102 | 3,4 | 12,8 F  | 49 | 165 | 62  |
| 57  | 226 | 68  | 3,7 | 15,7 M  | 52 | 178 | 98  |
| 62  | 227 | 56  | 3,6 | 12,4 F  | 77 | 165 | 70  |
| 99  | 320 | 66  | 3,7 | 16,1 M  | 60 | 175 | 90  |
| 64  | 259 | 58  | 3,4 | 11,6 M  | 64 | 168 | 60  |
| 143 | 158 | 102 | 2,7 | 13,7 M  | 80 | 167 | 67  |
| 58  | 226 | 47  | 3   | 11,3 F  | 76 | 170 | 110 |
| 86  | 202 | 79  | 4   | 15,8 M  | 54 | 165 | 76  |
| 140 | 67  | 70  | 3,6 | 8,4 M   | 77 | 170 | 72  |
| 95  | 258 | 88  | 3,4 | 14 M    | 56 | 180 | 65  |
| 78  | 234 | 70  | 3,4 | 12,4 M  | 80 | 160 | 50  |
| 82  | 239 | 106 | 3,4 | 13,7 F  | 40 | 166 | 83  |
| 121 | 255 | 109 | 3,8 | 14,1 M  | 72 | 180 | 85  |
| 77  | 228 | 82  | 3,7 | 14,6 M  | 44 | 170 | 70  |
| 88  | 303 | 93  | 4,2 | 14,7 M  | 76 | 166 | 82  |
| 124 | 170 | 48  | 4,3 | 10,7 F  | 49 | 170 | 64  |
| 155 | 209 | 75  | 3,7 | 15,2 M  | 74 | 160 | 62  |
| 72  | 230 | 55  | 3,4 | 12,3 M  | 67 | 180 | 85  |
| 91  | 234 | 73  | 3,2 | 13 F    | 63 | 172 | 54  |
| 138 | 245 | 105 | 3,3 | 14,8 M  | 78 | 165 | 79  |
| 97  | 244 | 63  | 3,5 | 18 F    | 75 | 164 | 58  |
| 77  | 279 | 90  | 3,5 | 14,1 M  | 61 | 175 | 103 |
| 64  | 180 | 60  | 3,8 | 14,9 M  | 58 | 168 | 57  |
| 135 | 250 | 63  | 4,1 | 13,4 F  | 63 | 162 | 89  |
| 47  | 192 | 89  | 1,8 | 9,8 M   | 87 | 160 | 57  |
| 43  | 139 | 60  | 3,9 | 16,6 M  | 60 | 185 | 84  |
| 61  | 170 | 68  | 3,2 | 12,7 F  | 82 | 160 | 62  |
| 87  | 307 | 108 | 3,6 | 13,8 F  | 77 | 165 | 79  |
| 74  | 233 | 89  | 3,9 | 14,1 M  | 73 | 170 | 84  |
| 62  | 271 | 112 | 3,8 | 13,7 M  | 77 | 155 | 77  |
| 101 | 225 | 69  | 4   | 12 F    | 70 | 160 | 54  |
| 55  | 160 | 59  | 2,8 | 13,8 F  | 78 | 160 | 54  |
| 50  | 149 | 55  | 2,9 | 13 F    | 79 | 155 | 45  |
| 81  | 281 | 68  | 3,1 | 16,2 M  | 77 | 180 | 120 |
| 71  | 258 | 78  | 4,3 | 14,01 M | 35 | 165 | 73  |
| 90  | 217 | 60  | 3,8 | 9,5 M   | 27 | 179 | 65  |
| 49  | 267 | 50  | 2,7 | 8,7 F   | 75 | 160 | 65  |
| 53  | 144 | 63  | 3,8 | 11,1 M  | 63 | 170 | 67  |
| 97  | 212 | 72  | 2,8 | 12,5 M  | 75 | 175 | 68  |
| 60  | 229 | 63  | 3,4 | 12,2 F  | 85 | 150 | 45  |
| 83  | 213 | 76  | 3,6 | 11,6 M  | 30 | 180 | 74  |
| 118 | 318 | 77  | 2,9 | 13,4 F  | 58 | 175 | 79  |
| 107 | 201 | 95  | 2,7 | 12,3 M  | 76 | 160 | 52  |
| 106 | 208 | 68  | 2,4 | 10,5 M  | 56 | 165 | 76  |
| 57  | 195 | 55  | 3,7 | 11,4 F  | 16 | 165 | 70  |
| 99  | 183 | 76  | 3,2 | 13,7 M  | 67 | 178 | 87  |
| 65  | 212 | 53  | 3,6 | 13,4 M  | 70 | 180 | 75  |
| 102 | 258 | 87  | 3,9 | 15,5 M  | 73 | 176 | 62  |



|     |     |     |     |        |    |     |     |
|-----|-----|-----|-----|--------|----|-----|-----|
| 114 | 247 | 74  | 3,8 | 14,8 M | 88 | 165 | 63  |
| 99  | 218 | 79  | 3,3 | 13,3 F | 86 | 160 | 56  |
| 70  | 179 | 88  | 1,8 | 8,5 M  | 61 | 170 | 63  |
| 119 | 202 | 72  | 3,1 | 12,7 F | 79 | 165 | 72  |
| 113 | 212 | 52  | 3,4 | 12,6 F | 79 | 166 | 60  |
| 87  | 227 | 79  | 2,8 | 8,7 F  | 82 | 160 | 73  |
| 124 | 241 | 61  | 3,2 | 13,2 M | 73 | 168 | 86  |
| 80  | 221 | 77  | 2,6 | 9,5 M  | 46 | 170 | 60  |
| 55  | 229 | 74  | 2,9 | 12,4 F | 66 | 160 | 79  |
| 66  | 200 | 74  | 3,6 | 12,2 F | 53 | 158 | 52  |
| 40  | 183 | 45  | 2,7 | 12,9 M | 58 | 172 | 63  |
| 44  | 199 | 57  | 2,2 | 11,5 F | 56 | 158 | 47  |
| 115 | 245 | 77  | 3,3 | 15,7 M | 77 | 178 | 78  |
| 142 | 339 | 91  | 3,6 | 12,8 F | 64 | 158 | 67  |
| 81  | 261 | 83  | 3   | 13,4 M | 39 | 180 | 64  |
| 67  | 200 | 69  | 2,7 | 12,9 M | 77 | 180 | 105 |
| 27  | 162 | 43  | 3,3 | 9,7 M  | 74 | 185 | 70  |
| 108 | 255 | 68  | 3,6 | 12,6 M | 76 | 160 | 60  |
| 60  | 367 | 77  | 3,7 | 13,6 M | 54 | 185 | 99  |
| 86  | 200 | 57  | 3,6 | 12,3 F | 86 | 165 | 60  |
| 96  | 183 | 49  | 4   | 11,4 M | 35 | 168 | 85  |
| 58  | 190 | 67  | 3,2 | 13,5 M | 75 | 180 | 95  |
| 72  | 230 | 80  | 3,3 | 13,9 M | 64 | 168 | 80  |
| 47  | 188 | 79  | 3,1 | 13 F   | 52 | 150 | 59  |
| 77  | 200 | 54  | 4   | 15,5 M | 40 | 170 | 80  |
| 51  | 146 | 105 | 3   | 12,1 F | 79 | 163 | 61  |
| 55  | 115 | 47  |     |        |    |     |     |
| 64  | 125 | 51  |     |        |    |     |     |
| 56  | 130 | 43  |     |        |    |     |     |
| 50  | 120 | 44  |     |        |    |     |     |
| 68  | 104 | 40  |     |        |    |     |     |
| 52  | 105 | 48  |     |        |    |     |     |
| 55  | 110 | 44  |     |        |    |     |     |
| 51  | 127 | 40  |     |        |    |     |     |
|     | 124 | 57  |     |        |    |     |     |
|     | 51  | 28  |     |        |    |     |     |
|     | 121 | 56  |     |        |    |     |     |
|     | 63  | 43  |     |        |    |     |     |
|     | 100 | 40  |     |        |    |     |     |
|     | 71  | 35  |     |        |    |     |     |
|     | 85  | 46  |     |        |    |     |     |
